# Supplementary material for: Prognostic and Immunological Role of mRNA ac4C Regulator NAT10 in Pan-Cancer: New Territory&nbsp;for Cancer Research?
Source: Research Square preprint supplement (doi:10.21203/rs.3.rs-94029/v1), 2020-10-21
Supplement: Supplementary file 2 [file 305e727de35e9cb3b1adbbd4.docx]

**Supplementary Table 5. Relationships between prognosis and expression of the 10 genes were investigated in LIHC with respect to OS and RFS.**
