# Supplementary material for: Prognostic and Immunological Role of mRNA ac4C Regulator NAT10 in Pan-Cancer: New Territory&nbsp;for Cancer Research?
Source: Research Square preprint supplement (doi:10.21203/rs.3.rs-94029/v1), 2020-10-21
Supplement: Supplementary file 3 [file 5bdccda2f08756e0e991c072.docx]

| **Cancer** | **Cancer Type** | ***P*-Value** | **Fold change** | **Gene Rank (%)** | **Cancer** | **Normal** | **Sample Size** | **Reference (GSE/TCGA)** | **Reference (PMID)** |
| --- | --- | --- | --- | --- | --- | --- | --- | --- | --- |
| **Baldder** | Superficial Bladder Cancer | **2.34E-07** | 1.785 | 4 | 28 | 14 | 42 | GSE3167 | 15173019 |
|  | Superficial Bladder Cancer | **8.95E-10** | 2.182 | 12 | 28 | 48 | 76 |  | 16432078 |
| **Breast** | Male Breast Carcinoma | **2.00E-08** | 2.018 | 2 | 3 | 61 | 64 | TCGA |  |
|  | Invasive Ductal Breast Carcinoma | **4.73E-20** | 1.64 | 8 | 389 | 61 | 450 | TCGA |  |
|  | Invasive Breast Carcinoma | **7.66E-13** | 1.56 | 8 | 76 | 61 | 137 | TCGA |  |
|  | Mucinous Breast Carcinoma | **0.013** | 2.222 | 13 | 4 | 61 | 65 | TCGA |  |
|  | Medullary Breast Carcinoma | **1.90E-07** | 1.733 | 10 | 32 | 144 | 176 |  | 22522925 |
|  | Invasive Ductal Breast Carcinoma | **0.009** | 2.262 | 24 | 33 | 3 | 36 | GSE3971 | 15034139 |
|  | Lobular Breast Carcinoma | **0.014** | 1.87 | 25 | 20 | 3 | 23 | GSE3971 | 15034139 |
| **Colorectal** | Colorectal Carcinoma | **4.13E-20** | 2.612 | 1 | 70 | 12 | 82 | GSE9348 | 20143136 |
|  | Colon Adenocarcinoma | **5.20E-18** | 1.749 | 1 | 13 | 28 | 41 | GSE6988 | 17640062 |
|  | Colorectal Adenocarcinoma | **6.75E-18** | 1.695 | 1 | 45 | 24 | 69 | GSE20916 | 20957034 |
|  | Colorectal Carcinoma | **7.40E-09** | 1.623 | 4 | 36 | 24 | 60 | GSE20916 | 20957034 |
|  | Colon Adenocarcinoma | **9.91E-06** | 8.329 | 2 | 18 | 18 | 36 |  | 11306497 |
|  | Rectal Adenocarcinoma | **5.90E-28** | 2.209 | 2 | 65 | 65 | 130 | GSE20842 | 20725992 |
|  | Colon Adenoma | **5.66E-15** | 2.223 | 2 | 25 | 32 | 57 | GSE8671 | 18171984 |
|  | Rectal Adenoma | **8.21E-07** | 2.5 | 3 | 7 | 32 | 39 | GSE8671 | 18171984 |
|  | Colorectal Adenoma Epithelia | **2.09E-04** | 1.519 | 4 | 56 | 22 | 78 | GSE9689 | 18403596 |
|  | Colon Adenoma | **5.18E-07** | 2.454 | 3 | 5 | 10 | 15 | GSE20916 | 20957034 |
|  | Colon Adenoma Epithelia | **2.47E-06** | 1.883 | 4 | 5 | 10 | 15 | GSE20916 | 20957034 |
|  | Colon Carcinoma | **1.50E-08** | 3.171 | 4 | 5 | 10 | 15 | GSE20916 | 20957034 |
|  | Colon Carcinoma Epithelia | **4.49E-07** | 2.358 | 5 | 5 | 10 | 15 | GSE20916 | 20957034 |
|  | Cecum Adenocarcinoma | **8.78E-08** | 1.655 | 10 | 22 | 22 | 44 | TCGA |  |
|  | Rectal Adenocarcinoma | **1.70E-09** | 1.649 | 13 | 60 | 22 | 82 | TCGA |  |
|  | Colon Adenocarcinoma | **9.20E-09** | 1.583 | 16 | 101 | 22 | 123 | TCGA |  |
|  | Rectal Mucinous Adenocarcinoma | **0.003** | 1.647 | 16 | 6 | 22 | 28 | TCGA |  |
| **Esophageal** | Esophageal Adenocarcinoma | **0.002** | 1.713 | 5 | 8 | 8 | 16 | GSE1420 | 15833844 |
|  | Esophageal Adenocarcinoma | **0.005** | 2.576 | 18 | 5 | 26 | 31 | GSE6059 | 16952561 |
| **Gastric** | Gastric Cancer | **2.09E-04** | 1.619 | 5 | 80 | 80 | 160 | GSE27342 | 20965966 |
|  | Gastric Intestinal Type Adenocarcinoma | **2.08E-08** | 1.957 | 7 | 26 | 31 | 57 | GSE13911 | 19081245 |
|  | Gastric Mixed Adenocarcinoma | **0.002** | 1.567 | 12 | 4 | 31 | 35 | GSE13911 | 19081245 |
| **Kidney** | Renal Pelvis Urothelial Carcinoma | **6.31E-04** | 1.669 | 18 | 8 | 23 | 31 | GSE15641 | 16115910 |
|  | Renal Wilms Tumor | **0.010** | 2.043 | 12 | 4 | 5 | 9 | GSE11151 | 19445733 |
|  | Chromophobe Renal Cell Carcinoma | **0.027** | 1.511 | 20 | 4 | 5 | 9 | GSE11151 | 19445733 |
| **Leukemia** | T-Cell Acute Lymphoblastic Leukemia | **5.52E-08** | 2.152 | 3 | 11 | 6 | 17 | GSE7186 | 17410184 |
|  | Acute Myeloid Leukemia | **8.53E-08** | 1.91 | 5 | 23 | 6 | 29 | GSE7186 | 17410184 |
|  | B-Cell Acute Lymphoblastic Leukemia | **5.22E-07** | 1.782 | 11 | 87 | 6 | 93 | GSE7186 | 17410184 |
|  | T-Cell Childhood Acute Lymphoblastic Leukemia | **0.006** | 1.513 | 14 | 46 | 4 | 50 | GSE28497 | 21487112 |
| **Liver** | Hepatocellular Carcinoma | **5.19E-06** | 1.529 | 7 | 22 | 21 | 43 | GSE14520 | 21159642 |
|  | Hepatocellular Carcinoma | **7.69E-04** | 1.618 | 12 | 35 | 10 | 45 | GSE6764 | 17393520 |
| **Lung** | Lung Adenocarcinoma | **1.95E-19** | 1.631 | 1 | 58 | 58 | 116 | GSE32863 | 22613842 |
|  | Lung Adenocarcinoma | **3.67E-07** | 1.689 | 2 | 27 | 30 | 57 | GSE7670 | 17540040 |
|  | Squamous Cell Lung Carcinoma | **1.41E-05** | 1.659 | 16 | 27 | 65 | 92 | GSE19188 | 20421987 |
| **Lymphoma** | Anaplastic Large Cell Lymphoma | **0.001** | 1.696 | 19 | 6 | 20 | 26 | GSE6338 | 17304354 |
|  | Angioimmunoblastic T-Cell Lymphoma | **0.002** | 1.715 | 21 | 6 | 20 | 26 | GSE6338 | 17304354 |
|  | Diffuse Large B-Cell Lymphoma | **0.002** | 1.614 | 20 | 11 | 25 | 36 | GSE12453 | 18794340 |
|  | Burkitt's Lymphoma | **0.034** | 1.523 | 41 | 5 | 25 | 30 | GSE12453 | 18794340 |
| **Myeloma** | Plasma Cell Leukemia | **1.30E-04** | 1.789 | 4 | 9 | 5 | 14 | GSE13591 | 19396863 |
|  | Smoldering Myeloma | **7.69E-04** | 1.812 | 28 | 12 | 22 | 34 | GSE5900 | 17023574 |
| **Prostate** | Prostate Carcinoma | **0.050** | 4 | 13 | 15 | 15 | 30 |  | 11807955 |
| **Sarcoma** | Round Cell Liposarcoma | **0.002** | 1.905 | 7 | 4 | 15 | 19 | GSE2719 | 15994966 |
| **Other** | Skin Basal Cell Carcinoma | **0.011** | 1.511 | 17 | 15 | 4 | 19 | GSE7553 | 18442402 |

Bold values indicate *P* < 0.05.

**Supplementary Table 1. NAT10 expression in cancer in cancers verus normal tissue in oncomine database.**
